# Supplementary material for: Organosilanes and their magnetic nanoparticles as naked eye red emissive sensors for Ag+ ions and potent anti-oxidants
Source: Royal Society of Chemistry journal article supplement (doi:10.1039/d1nj00242b), 2021-01-01
Supplement: d1nj00242b1.pdf [file d1nj00242b1.pdf]

**Organosilanes and their Magnetic Nanoparticles as Naked Eye Red Emissive Sensors  
for Ag<sup>+</sup> ions and Potent Anti-oxidants**

Gurjaspreet Singh<sup>a\*</sup>, Diksha<sup>a</sup>, Akshpreet Singh<sup>b</sup>, Pinky Satija<sup>a</sup>, Pawan<sup>a</sup>, Mohit<sup>a</sup>, D González-Silvera<sup>c</sup>, Cristóbal Espinosa-Ruíz<sup>c</sup>, María Angeles Esteban<sup>c\*</sup>

<sup>a</sup>Department of Chemistry, Panjab University, Chandigarh, 160014, India

<sup>b</sup>Department of Chemistry, Goswami Ganesh Dutta Sanatan Dharma College College, Sector-32C, Chandigarh, India

<sup>c</sup>Department of Cell Biology & Histology, Faculty of Biology, University of Murcia, 30100 Murcia, Spain

\*Corresponding Authors

1. Prof. Gurjaspreet Singh

Department of Chemistry & Centre of Advanced Studies

Panjab University, Chandigarh, India

Email: [gjpsingh@pu.ac.in](mailto:gjpsingh@pu.ac.in)

2. Prof. M. Angeles Esteban

Department of Cell Biology & Histology

University of Murcia, 30100 Murcia, Spain.

Email: [aesteban@um.es](mailto:aesteban@um.es)

| <b>Entry</b>                                          | <b>Page No.</b> |
|-------------------------------------------------------|-----------------|
| <sup>1</sup> H NMR spectrum of compound 7a ( Fig.S1)  | 2               |
| <sup>1</sup> H NMR spectrum of compound 7b ( Fig.S2)  | 3               |
| <sup>1</sup> H NMR spectrum of compound 8a ( Fig.S3)  | 4               |
| <sup>1</sup> H NMR spectrum of compound 8b ( Fig.S4)  | 4               |
| <sup>13</sup> C NMR spectrum of compound 8a ( Fig.S5) | 5               |
| <sup>13</sup> C NMR spectrum of compound 8b ( Fig.S6) | 5               |
| Mass spectrum of compound 8a (Fig. S7)                | 6               |
| Mass spectrum of compound 8b (Fig. S8)                | 6               |
| IR spectrum of compound 7a (Fig. S9)                  | 7               |

|                                                                                                                                                                                             |    |
|---------------------------------------------------------------------------------------------------------------------------------------------------------------------------------------------|----|
| IR spectrum of compound 7b (Fig. S10)                                                                                                                                                       | 7  |
| IR spectrum of compound 8a (Fig. S11)                                                                                                                                                       | 7  |
| IR spectrum of compound 8b (Fig. S12)                                                                                                                                                       | 8  |
| The photograph of visual colour change of receptor upon addition of methanolic of different metal ions (Fig. S13)                                                                           | 9  |
| Antioxidant activity of compounds AC and PC (Fig. S14)                                                                                                                                      | 9  |
| Cytotoxicity assay of compounds AC and PC against HeLa cell (Fig. S15)                                                                                                                      | 9  |
| FT-IR spectra of (a) AC (b) AC + Ag complex (Fig. S16)                                                                                                                                      | 10 |
| Thermogravimetric curves of Fe <sub>3</sub> O <sub>4</sub> ; Fe <sub>3</sub> O <sub>4</sub> @SiO <sub>2</sub> ; Fe <sub>3</sub> O <sub>4</sub> @SiO <sub>2</sub> @Silane; Silane (Fig. S17) | 10 |
| XRD pattern of (a)Fe <sub>3</sub> O <sub>4</sub> (b)Fe <sub>3</sub> O <sub>4</sub> @SiO <sub>2</sub> @Silane (Fig. S18)                                                                     | 11 |
| FESEM images of Fe <sub>3</sub> O <sub>4</sub> @SiO <sub>2</sub> @Silane at different Magnifications (Fig. S19)                                                                             | 11 |
| EDX pattern of Fe <sub>3</sub> O <sub>4</sub> @SiO <sub>2</sub> @Silane (Fig. S20)                                                                                                          | 11 |
| VSM graph of Fe <sub>3</sub> O <sub>4</sub> @SiO <sub>2</sub> @Silane (Fig. S21)                                                                                                            | 12 |

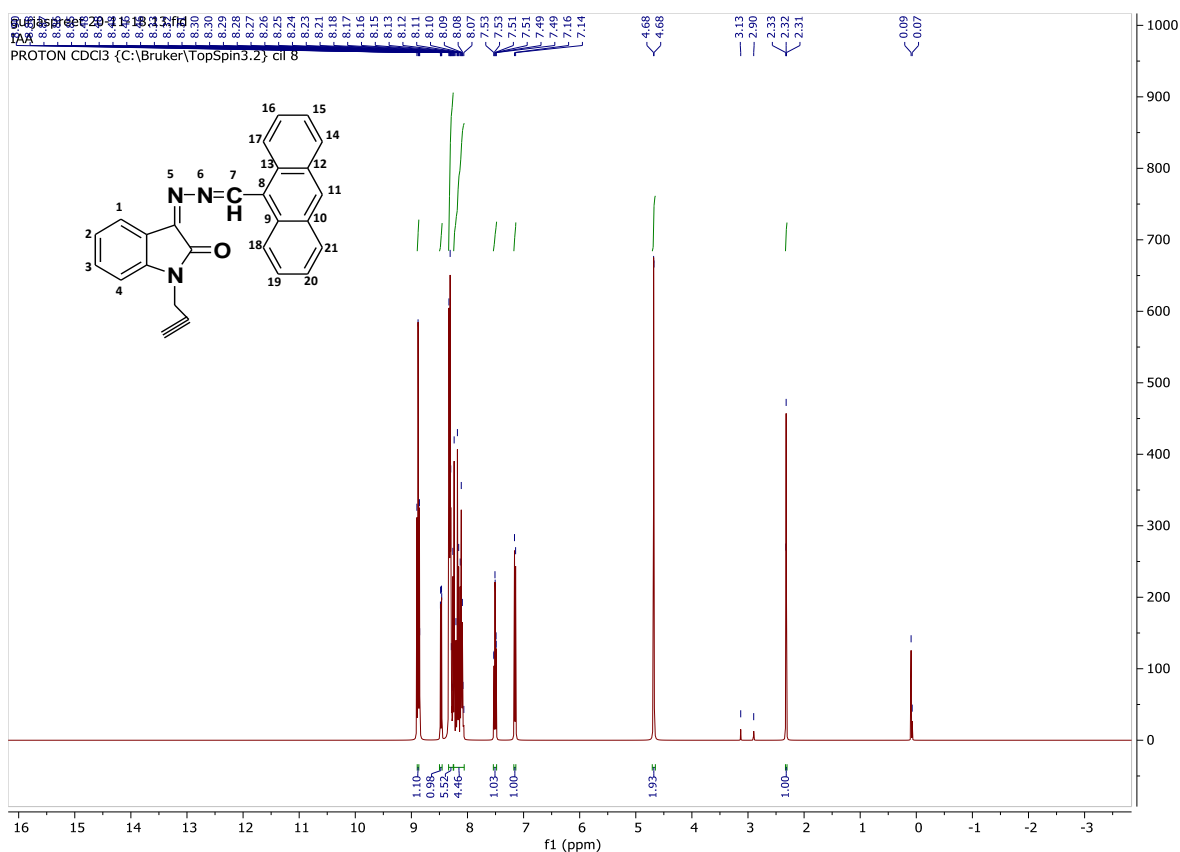

Fig.S1 <sup>1</sup>H NMR spectrum of compound 7a

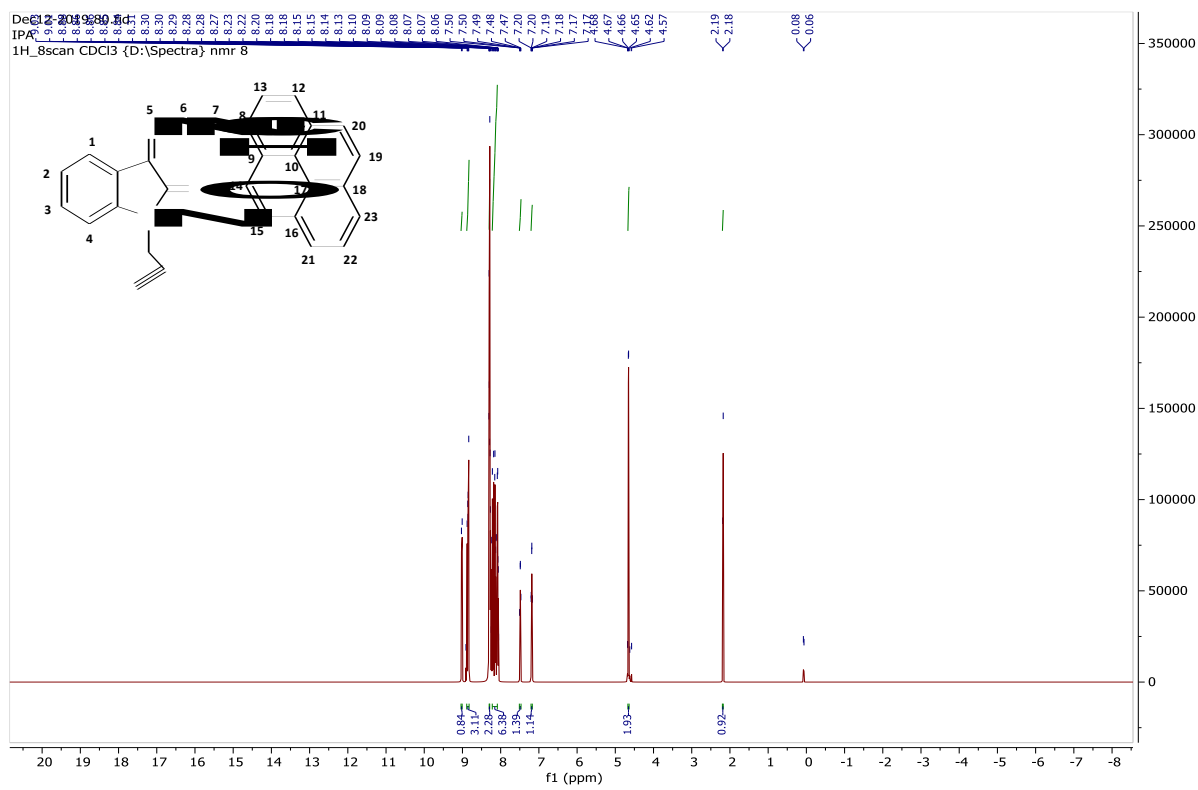

Fig.S2 <sup>1</sup>H NMR spectrum of compound 7b

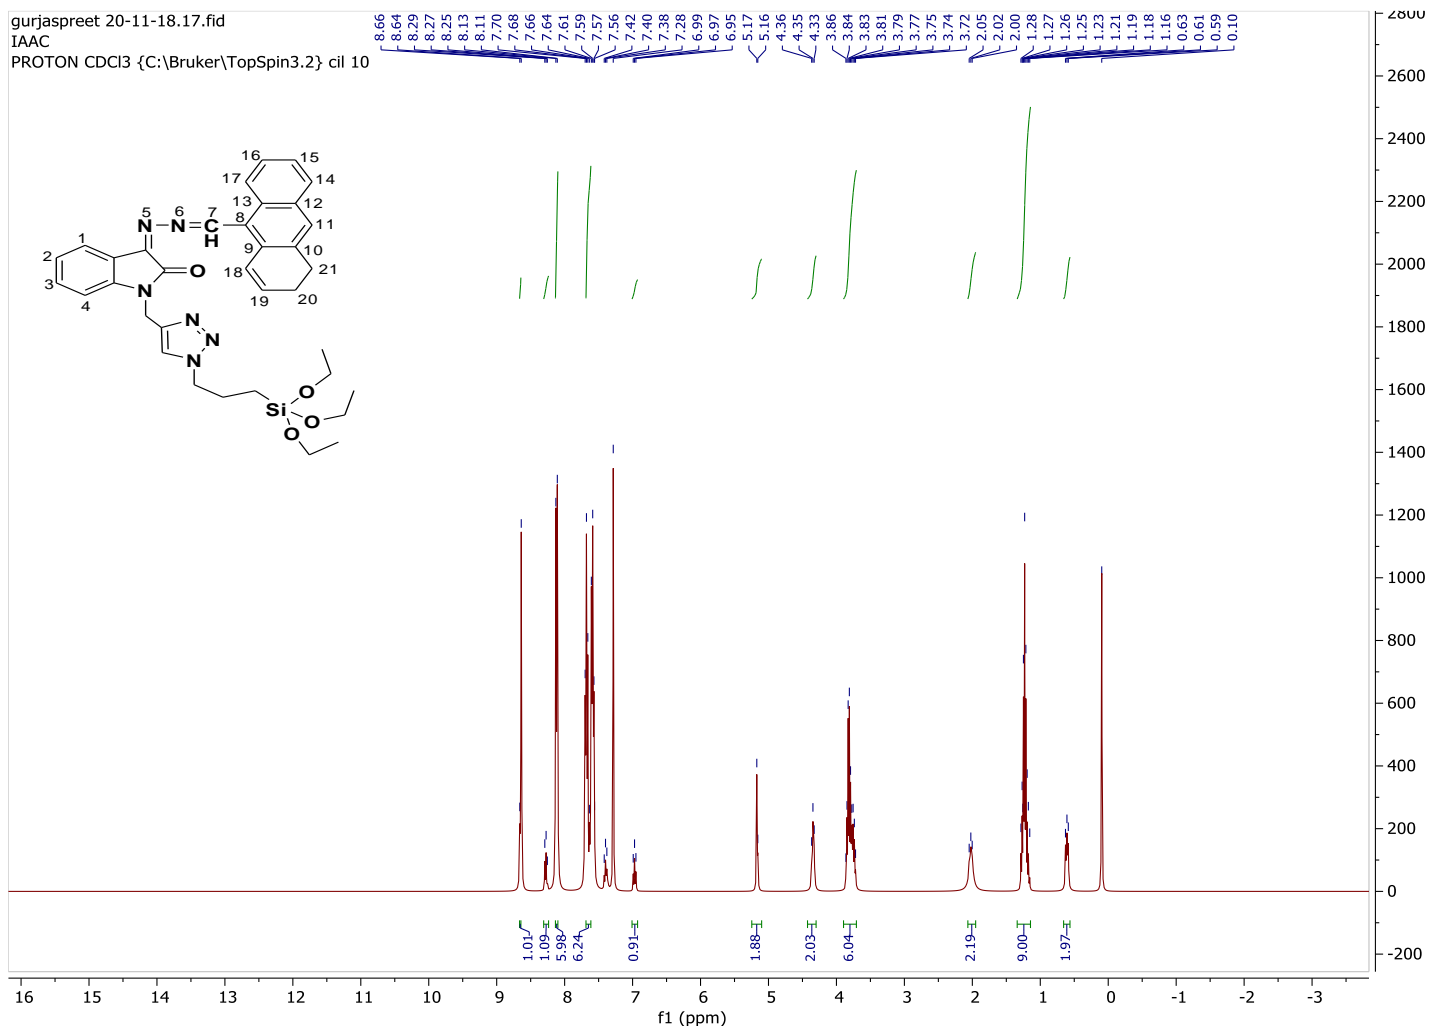

Fig.S3 <sup>1</sup>H NMR spectrum of compound 8a

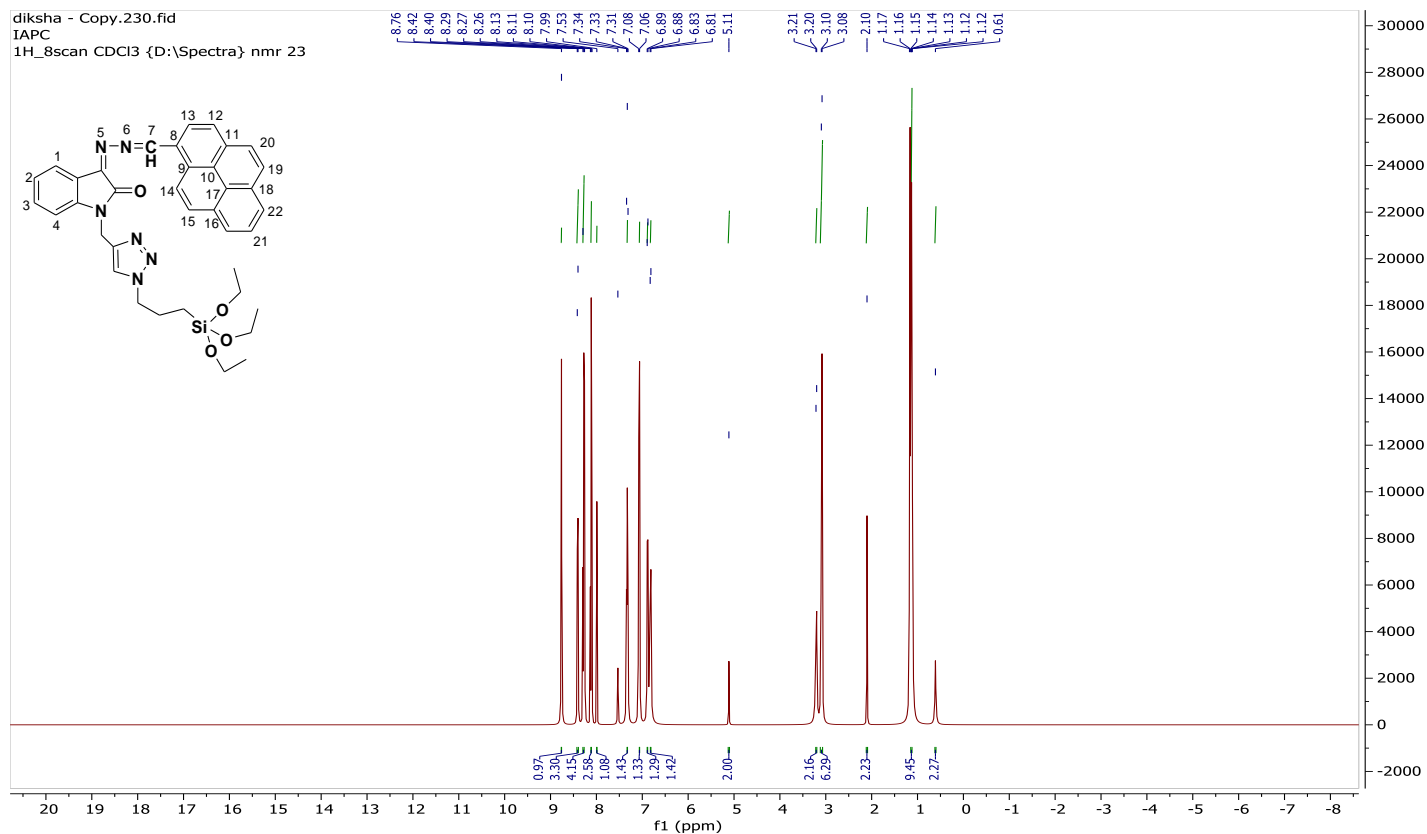

Fig.S4 <sup>1</sup>H NMR spectrum of compound 8b

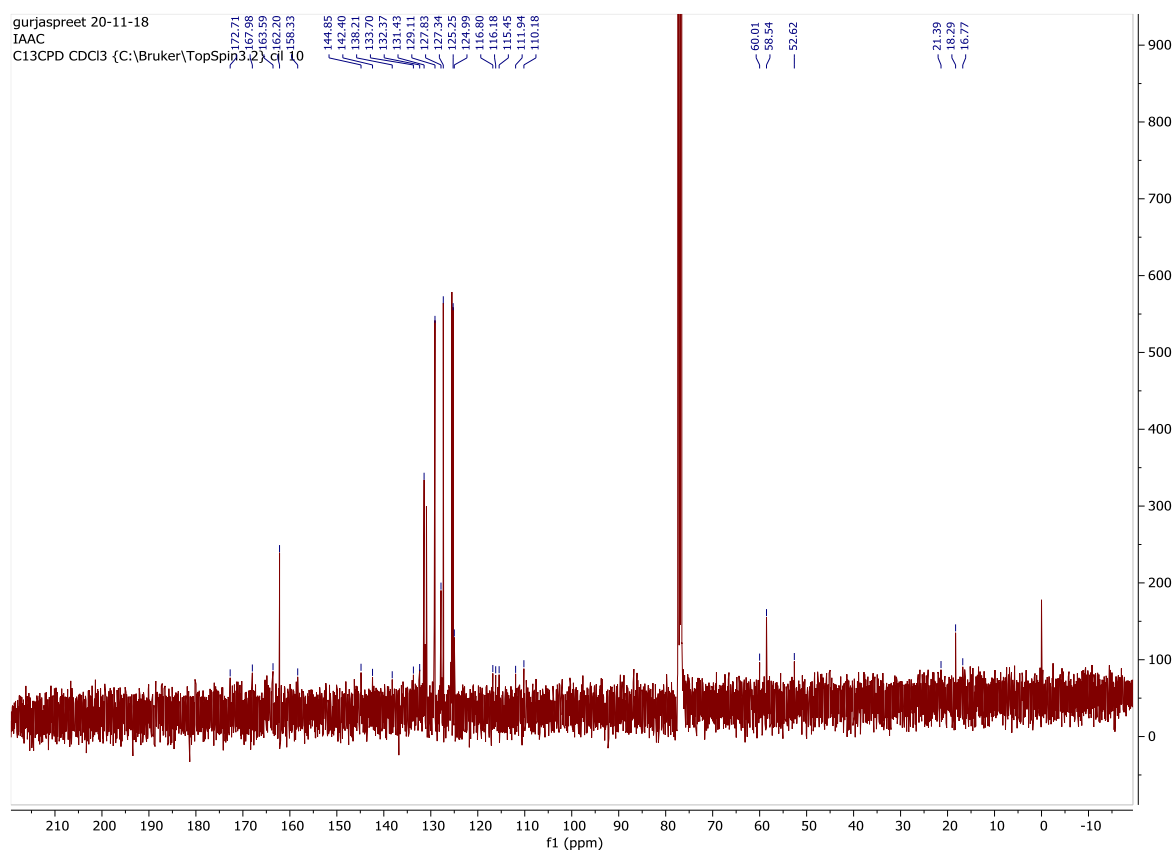

**Fig.S5**  $^{13}\text{C}$  NMR spectrum of compound 8a

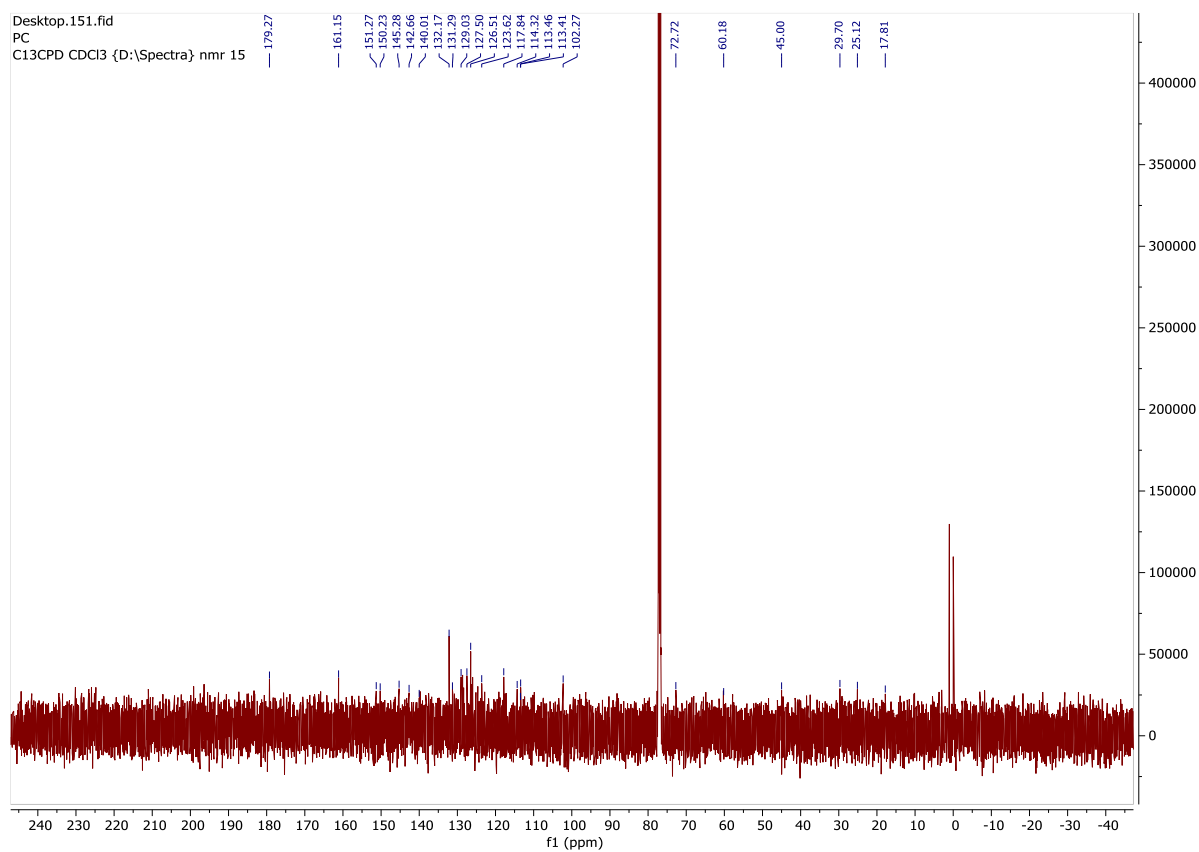

**Fig.S6**  $^{13}\text{C}$  NMR spectrum of compound 8b

WATERS,Q-TOF MICROMASS (ESI-MS)  
DIKSHA IAC 6 (0.163) Cm (4:10-12:28)

SAIF/CIL,PANJAB UNIVERSITY,CHANDIGARH  
TOF MS ES+  
3.94e3

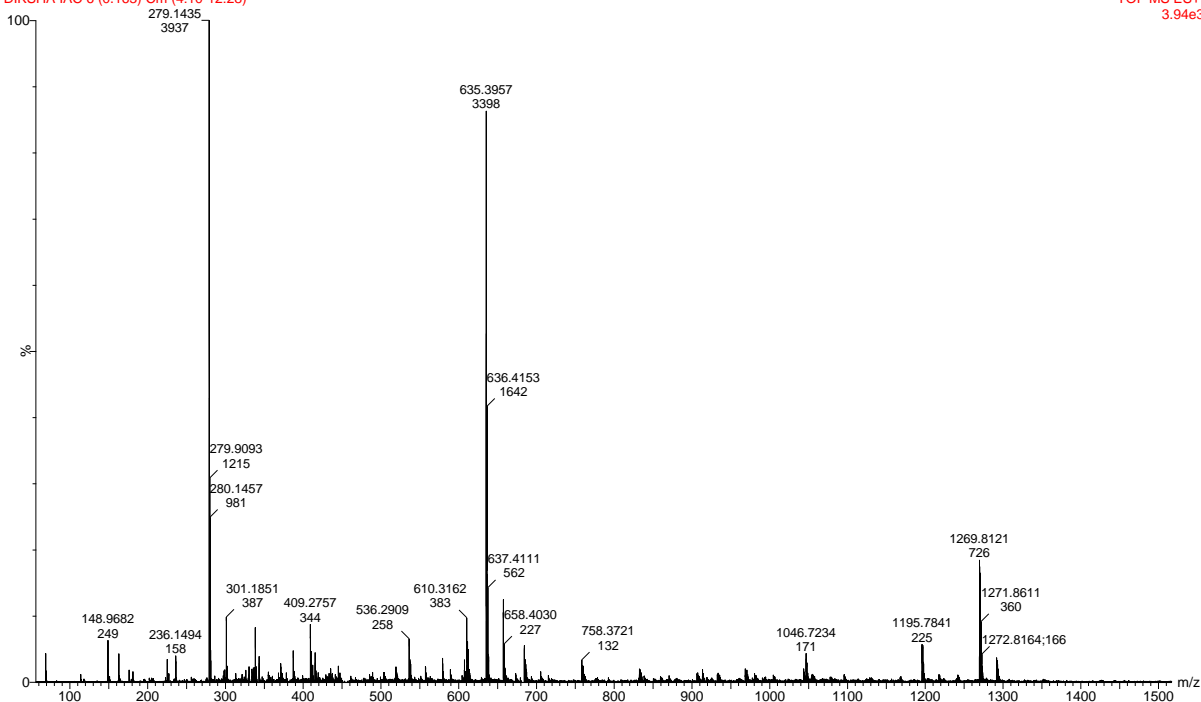

Fig.S7 Mass spectrum of compound 8a

WATERS,Q-TOF MICROMASS (ESI-MS)  
DIKSHA IPC 8 (0.234) Cm (1:17)

SAIF/CIL,PANJAB UNIVERSITY,CHANDIGARH  
TOF MS ES+  
3.35e3

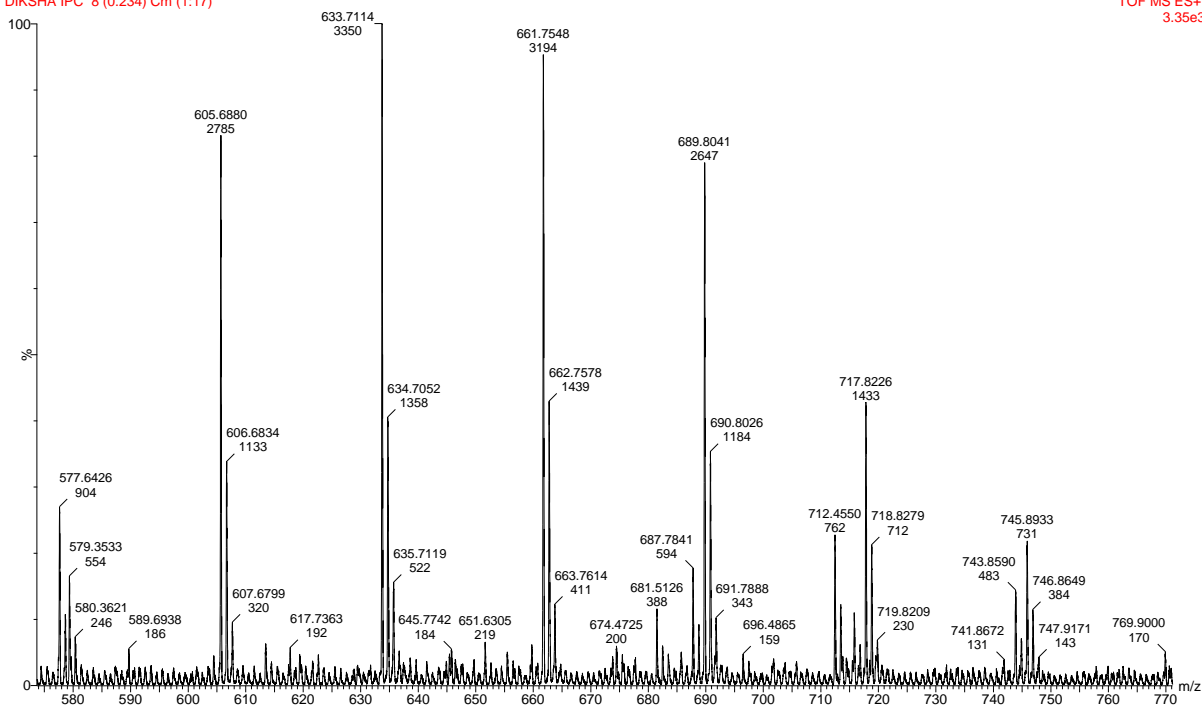

Fig.S8 Mass spectrum of compound 8b

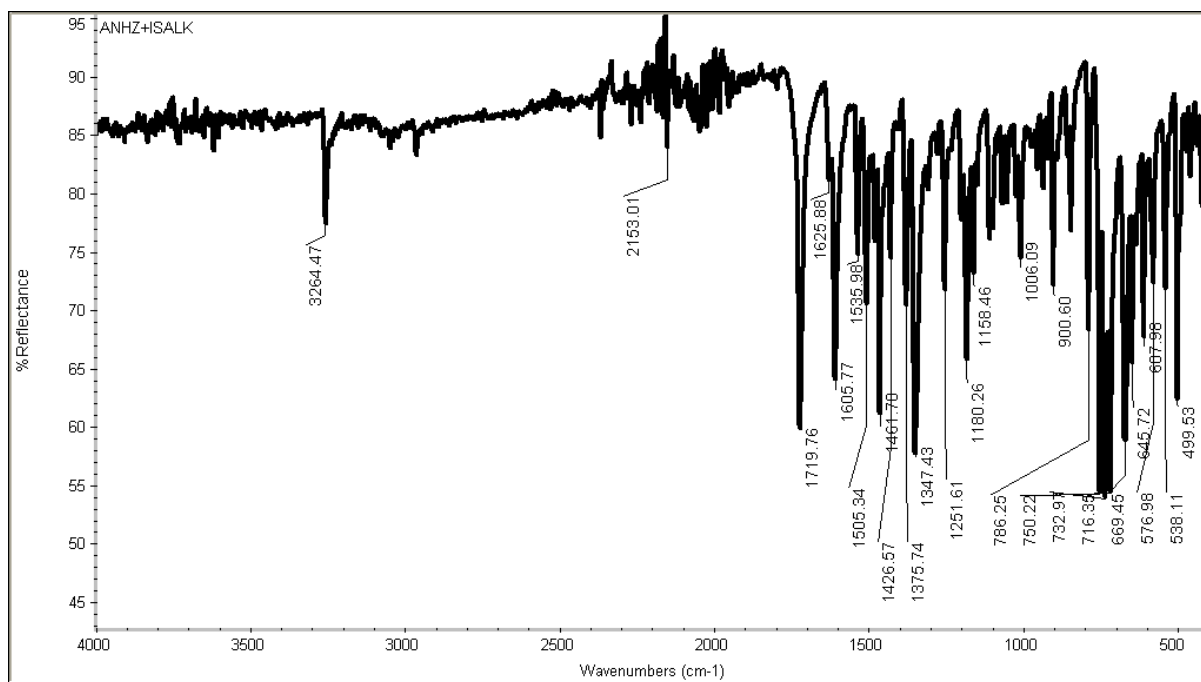

Fig.S9 IR spectrum of compound 7a

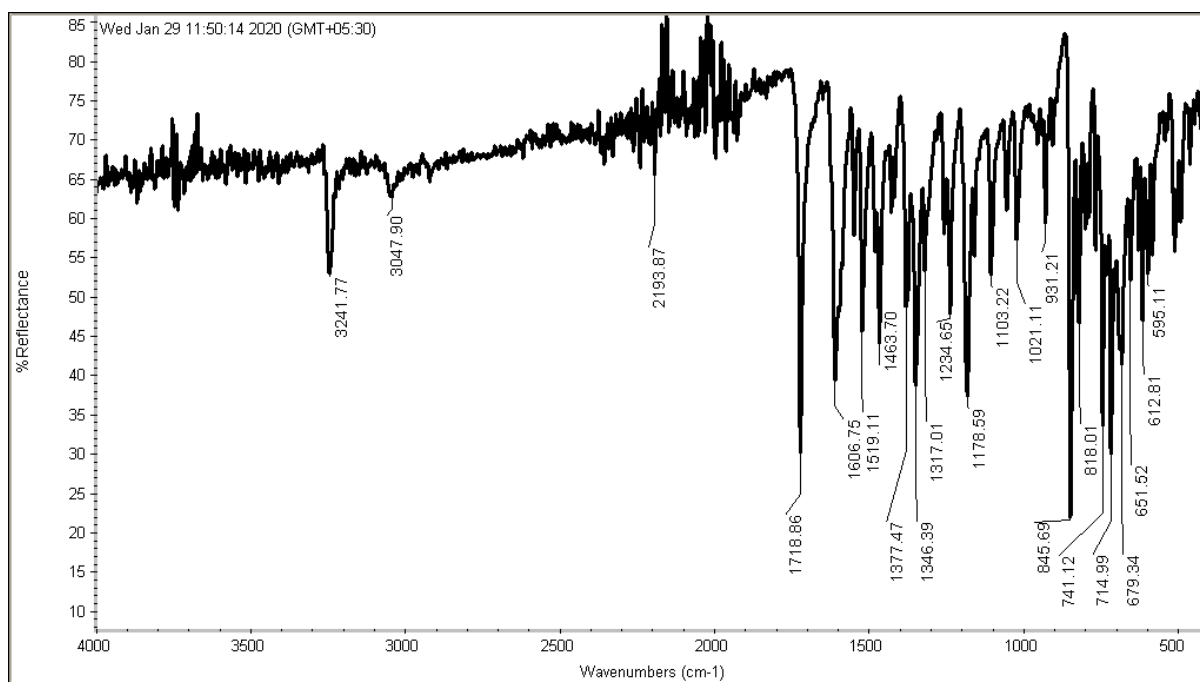

Fig.S10 IR spectrum of compound 7b

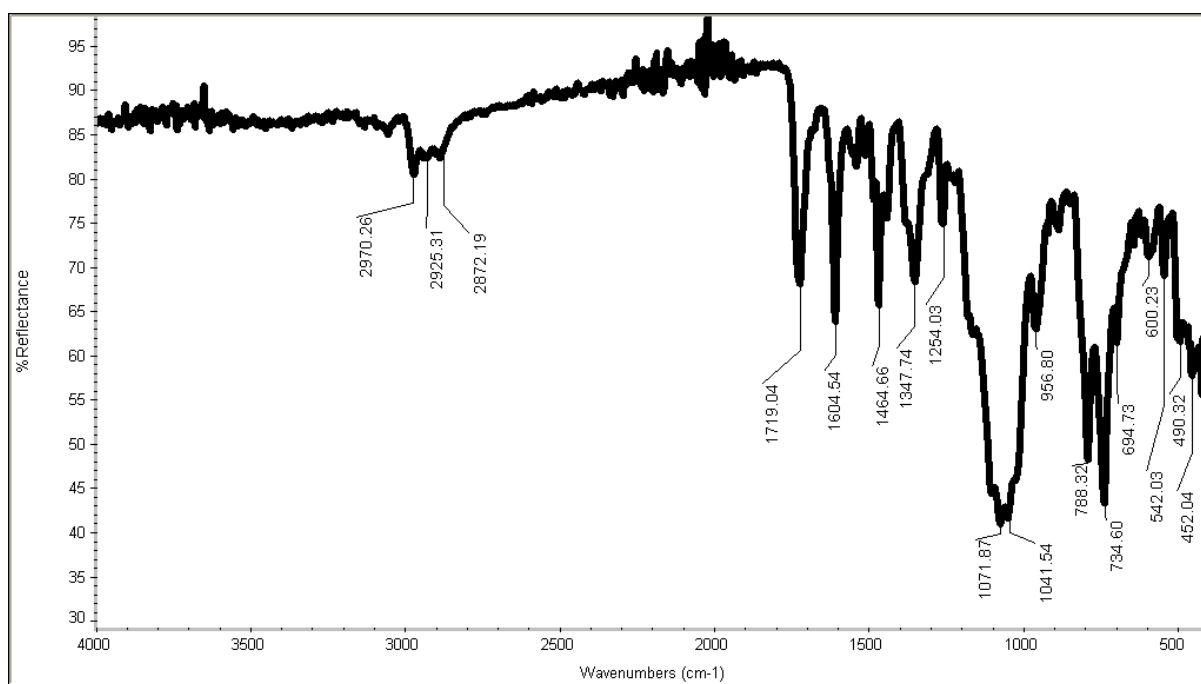

Fig.S11 IR spectrum of compound 8a

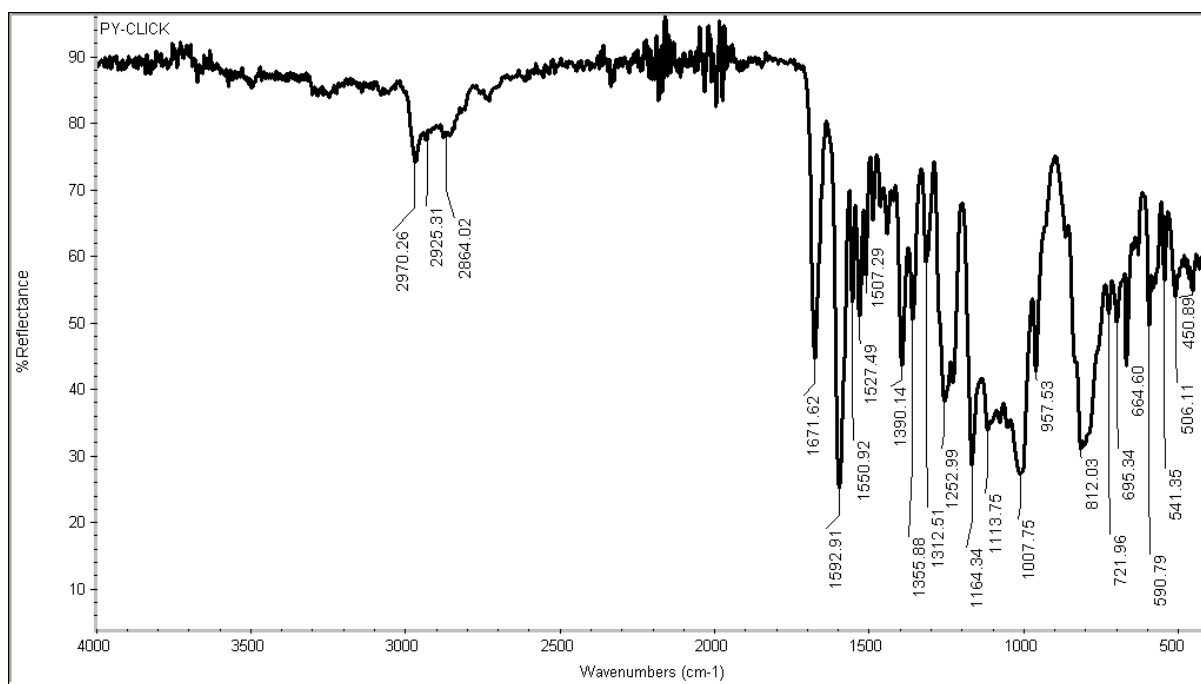

Fig.S12 IR spectrum of compound 8b



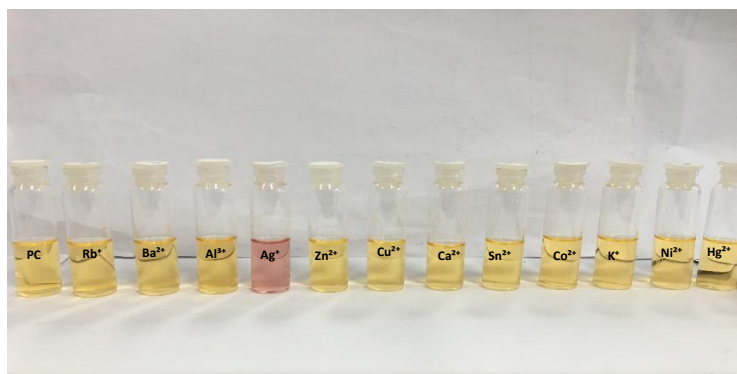

**Fig S13.** The photograph of visual colour change of receptor upon addition of methanolic solution of different metal ions

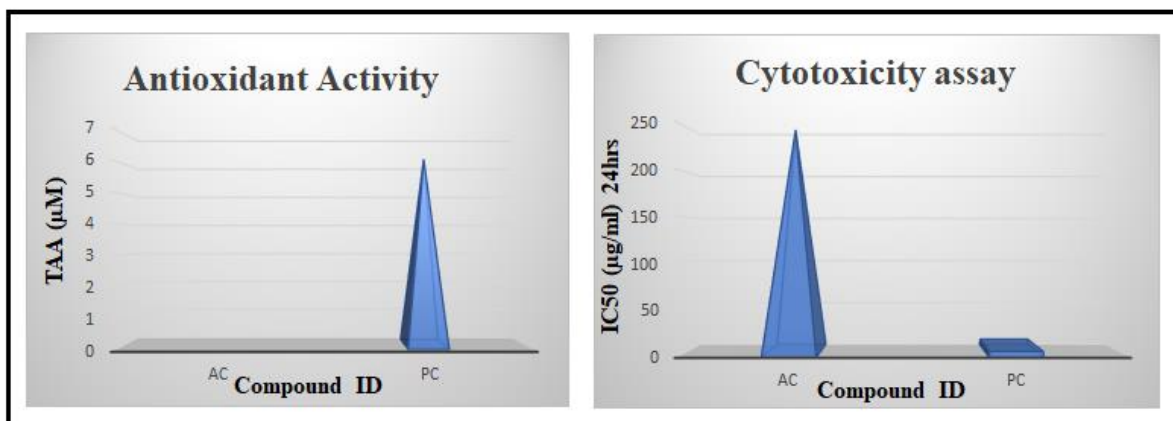

**Fig S14.** Antioxidant activity of compounds AC and PC

**Fig S15.** Cytotoxicity assay of compounds AC and PC against HeLa cell

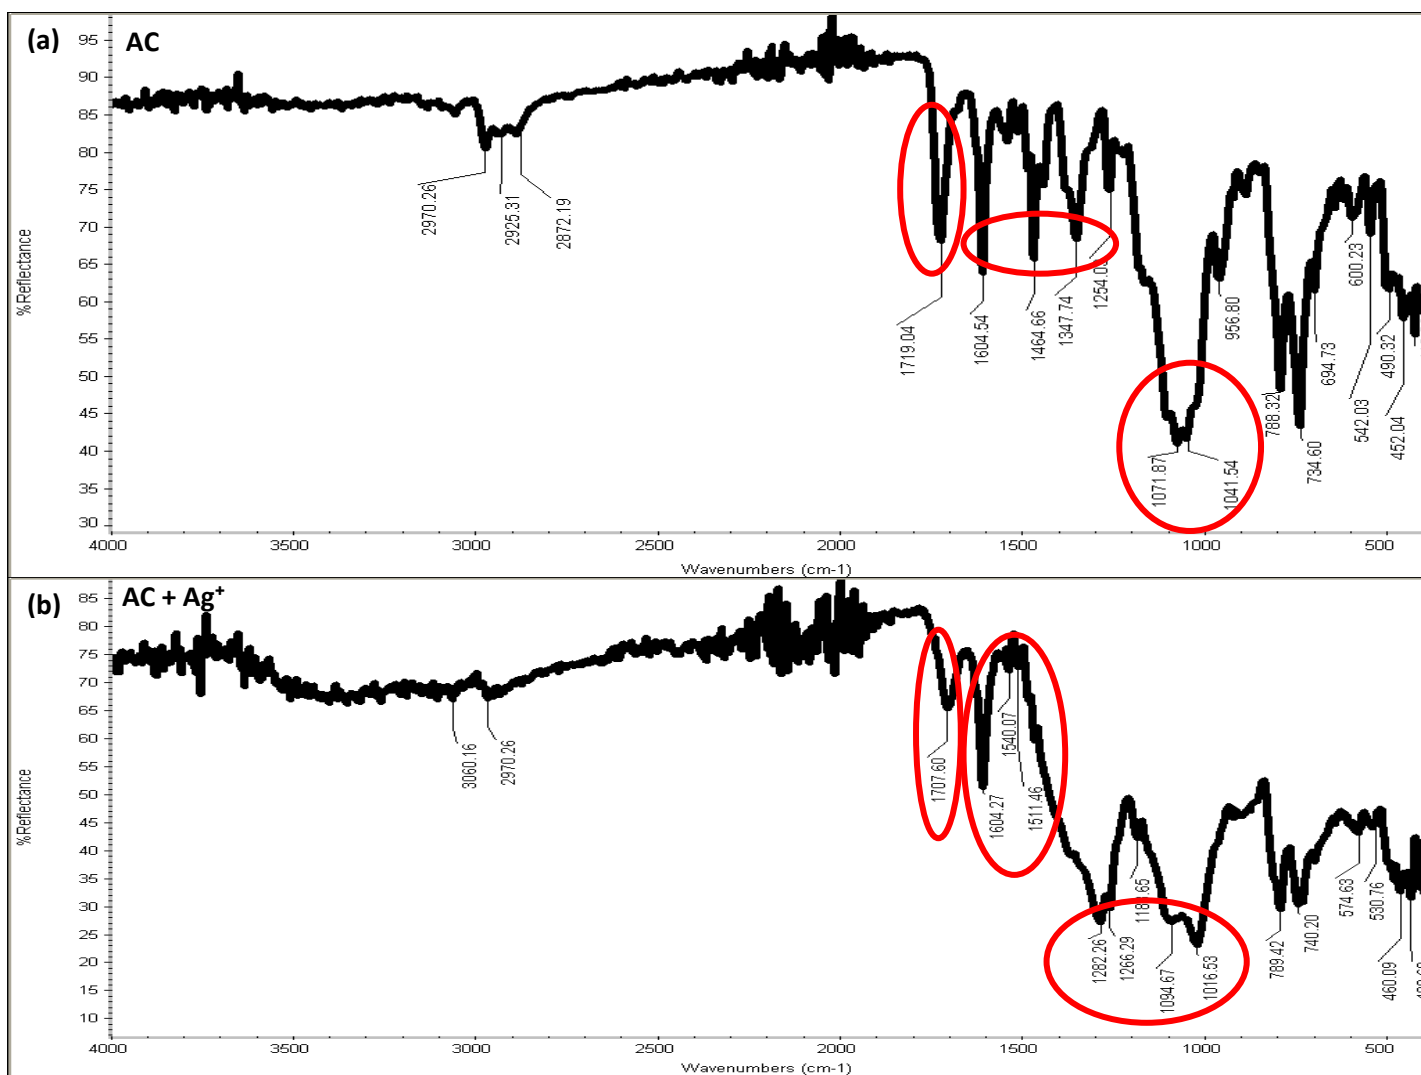

Fig S16. FT-IR spectra of (a) AC (b) AC + Ag complex

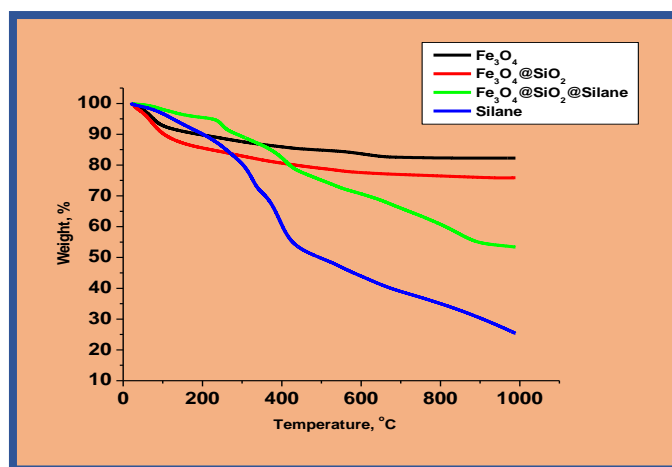

Fig S17. Thermogravimetric curves of  $\text{Fe}_3\text{O}_4$ ;  $\text{Fe}_3\text{O}_4@SiO_2$ ;  $\text{Fe}_3\text{O}_4@SiO_2@Silane$ ; Silane

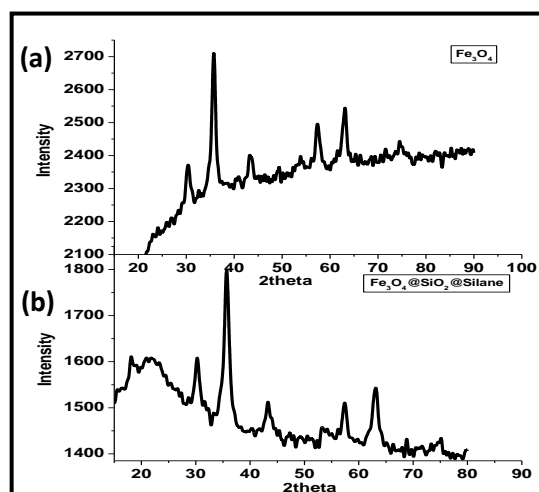

**Fig S18.** XRD pattern of (a)Fe<sub>3</sub>O<sub>4</sub> (b)Fe<sub>3</sub>O<sub>4</sub>@SiO<sub>2</sub>@Silane

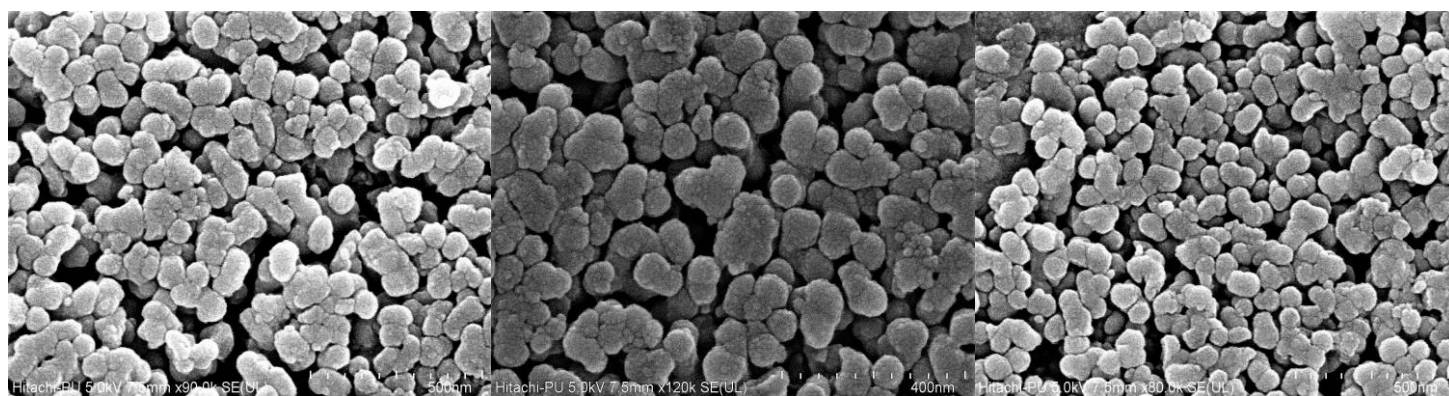

**Fig S19.** FESEM images of Fe<sub>3</sub>O<sub>4</sub>@SiO<sub>2</sub>@Silane at different magnifications

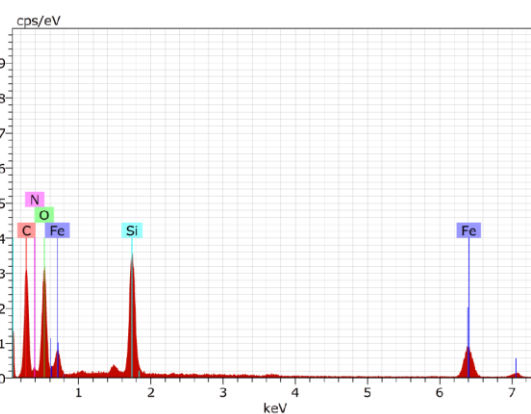

**Fig S20.** EDX pattern of Fe<sub>3</sub>O<sub>4</sub>@SiO<sub>2</sub>@Silane

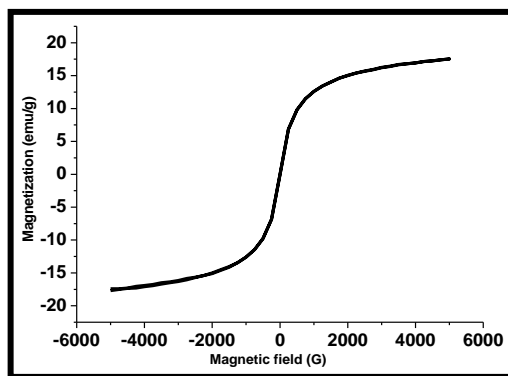

**Fig S21.** VSM graph of  $\text{Fe}_3\text{O}_4@\text{SiO}_2@\text{Silane}$
